# Supplementary material for: Quality and quantity of dromedary camel DNA sampled from whole-blood, saliva, and tail-hair
Source: PLoS One. 2019 Jan 31;14(1):e0211743. doi: 10.1371/journal.pone.0211743 (PMC6355012; doi:10.1371/journal.pone.0211743)
Supplement: S4 Table — Permutation-based ANCOVA summary tables, testing the difference in the relationship between extracted DNA amount of first elution (response variable) and time (covariate) for saliva DNA samples among each of the following fixed factors: (a) replica, (b) individual camel, and (c) breed. df = degrees of freedom, SS = unique sums of squares, MS = mean square, p = permutation test p-values. Statistical significance is based on a maximum of 100,000 iterations. Significant p-values are in bold. (XLSX) [file pone.0211743.s008.xlsx]

## Sheet: table
	df	SS	MS	p
a. ANCOVA 1
Time	1	38.808	38.808	< 0.0001
Replica	2	9.23	4.615	0.2242
Time x Replica	2	1.571	0.786	0.7789
Residuals	102	252.006	2.471
b. ANCOVA 2
Time	1	38.808	38.808	< 0.0001
Individual camel	8	86.637	10.83	< 0.0001
Time x Individual camel	8	45.683	5.71	0.001226
Residuals	90	130.487	1.45
c. ANCOVA 3
Time	1	38.808	38.808	0.0002
Breed	2	7.604	3.802	0.6741
Time x Breed	2	6.409	3.204	0.4008
Residuals	102	248.794	2.439
