# Supplementary material for: Quality and quantity of dromedary camel DNA sampled from whole-blood, saliva, and tail-hair
Source: PLoS One. 2019 Jan 31;14(1):e0211743. doi: 10.1371/journal.pone.0211743 (PMC6355012; doi:10.1371/journal.pone.0211743)
Supplement: S5 Table — Permutation-based ANCOVA summary tables, testing the difference in the relationship between extracted DNA amount of first elution (response variable) and time (covariate) for tail-hair DNA samples among each of the following fixed factors: (a) replica, (b) individual camel, and (c) breed. df = degrees of freedom, SS = unique sums of squares, MS = mean square, p = permutation test p-values. Statistical significance is based on a maximum of 100,000 iterations. Significant p-values are in bold. (XLSX) [file pone.0211743.s009.xlsx]

## Sheet: table
	df	SS	MS	p
a. ANCOVA 1
Time	1	53.9	53.896	0.01522
Replica	2	7.69	3.844	0.87692
Time x Replica	2	7.48	3.738	0.62222
Residuals	102	749.88	7.352
b. ANCOVA 2
Time	1	53.896	53.896	0.00024
Individual camel	8	289.418	36.177	< 0.0001
Time x Individual camel	8	172.564	21.571	< 0.0001
Residuals	90	303.066	3.367
c. ANCOVA 3
Time	1	53.9	53.896	0.001131
Breed	2	191.26	95.628	< 0.0001
Time x Breed	2	38.75	19.374	0.01634
Residuals	102	535.04	5.246
